# Supplementary material for: Life and Death of Deep-Sea Vents: Bacterial Diversity and Ecosystem Succession on Inactive Hydrothermal Sulfides
Source: PubMed Central journal article supplement — mBio. 2012 Jan 24;3(1):e00279-11. doi: 10.1128/mBio.00279-11 (PMC3262234; doi:10.1128/mbio.00279-11), 2012-01-24
Supplement: mbo001121217st01.pdf [file mbo001121217st01.pdf]

**Table S1-** Sixteen most cosmopolitan tags and sixteen most abundant tags for extinct sulfides in this study. GAST classification and the closest BlastN hits in the NCBI database are given, followed by the samples on which the OTU was recovered and potential ecological role for the tags where all members of that bacterial group perform a defined role.

| VAMPS Taxonomy                                                                        | # Tags in OTU | Closest BlastN Hits (% Identity)                       | 3M23 | 3M33 | 7M24 | 9M32 | 9M4O | 9M4I | 9M4S | Potential Ecological Function |
|---------------------------------------------------------------------------------------|---------------|--------------------------------------------------------|------|------|------|------|------|------|------|-------------------------------|
| <b>Most Cosmopolitan</b>                                                              |               |                                                        |      |      |      |      |      |      |      |                               |
| Bacteroidetes: Flavobacteria: Flavobacteriales                                        | 14994         | FS396, extinct sulfide chimney clones (100)            | X    | X    | X    | X    | X    | X    | X    |                               |
| Proteobacteria: $\gamma$ -proteobacteria                                              | 10009         | Mariana Trough sulfide deposit clones (100)            | X    | X    | X    | X    | X    | X    | X    |                               |
| Proteobacteria: $\beta$ -proteobacteria: Burkholderiales: Burkholderiaceae: Ralstonia | 127           | multiple <i>Ralstonia</i> spp. (100)                   | X    | X    | X    | X    | X    | X    | X    |                               |
| Proteobacteria: $\alpha$ -proteobacteria: Rhodobacterales: Rhodobacteraceae           | 5659          | sediment clones (96)                                   |      | X    | X    | X    | X    | X    | X    |                               |
| Proteobacteria: $\gamma$ -proteobacteria: Xanthomonadales: Xanthomonadaceae           | 4133          | Mariana Trough sulfide deposit clones (98)             | X    | X    | X    | X    | X    |      | X    |                               |
| Proteobacteria                                                                        | 2682          | many clones (100)                                      | X    | X    | X    | X    | X    | X    |      |                               |
| Proteobacteria: $\alpha$ -proteobacteria                                              | 2000          | Lau Basin and Mariana Trough hydrothermal precipitates | X    | X    | X    | X    | X    | X    |      |                               |
| Proteobacteria                                                                        | 1789          | many clones (100)                                      | X    | X    | X    | X    | X    |      | X    |                               |
| Proteobacteria: $\gamma$ -proteobacteria: Methylococcales: Methylococcaceae           | 1325          | many Methylococcales (100)                             | X    | X    | X    | X    | X    | X    |      | C1 metabolizer                |
| Proteobacteria: $\alpha$ -proteobacteria: Rhizobiales: Phyllobacteriaceae             | 1216          | clones from Lau Basin and Vailulu'u Seamount (100)     | X    | X    | X    | X    | X    |      | X    |                               |
| Bacteroidetes: Flavobacteria: Flavobacteriales                                        | 1135          | none                                                   | X    | X    |      | X    | X    | X    | X    |                               |
| Proteobacteria: $\alpha$ -proteobacteria: Rhodobacterales: Rhodobacteraceae: Ahrensia | 335           | hydrothermal vent clones (100)                         | X    | X    | X    | X    | X    | X    |      |                               |
| Proteobacteria: $\gamma$ -proteobacteria                                              | 247           | many $\gamma$ -proteobacteria clones (98)              | X    | X    |      | X    | X    | X    | X    |                               |
| Proteobacteria: $\gamma$ -proteobacteria                                              | 179           | many $\gamma$ -proteobacteria clones (100)             |      | X    | X    | X    | X    | X    | X    |                               |
| Proteobacteria: $\beta$ -proteobacteria: Burkholderiales:                             | 67            | <i>Acidovorax</i> and <i>Comomonas</i> spp. (100)      | X    |      | X    | X    | X    | X    | X    |                               |

## Comamonadaceae

|                                                                                              |       |                                                                      |   |   |   |   |   |   |                                    |
|----------------------------------------------------------------------------------------------|-------|----------------------------------------------------------------------|---|---|---|---|---|---|------------------------------------|
| Proteobacteria: $\gamma$ -proteobacteria                                                     | 41    | multiple sediment and symbiont $\gamma$ -proteobacteria clones (100) | X | X | X | X | X | X |                                    |
| <b>Most Abundant</b>                                                                         |       |                                                                      |   |   |   |   |   |   |                                    |
| Bacteroidetes: Flavobacteria: Flavobacteriales                                               | 14994 | FS396, extinct sulfide chimney clones (100)                          | X | X | X | X | X | X | X                                  |
| Proteobacteria: $\gamma$ -proteobacteria: Chromatiales: Ectothiorhodospiraceae               | 14862 | Mariana Trough inactive sulfide deposit clone (98)                   |   |   |   |   | X | X | X chemolithoautotrophic S-oxidizer |
| Proteobacteria: $\gamma$ -proteobacteria                                                     | 10009 | Mariana Trough sulfide deposit clones (100)                          | X | X | X | X | X | X | X                                  |
| Proteobacteria: $\gamma$ -proteobacteria                                                     | 8484  | many $\gamma$ -proteobacteria clones (100)                           | X | X | X | X |   |   |                                    |
| Proteobacteria: $\delta$ -proteobacteria: Desulfobacterales: Desulfobulbaceae: Desulfobulbus | 7067  | Mariana Trough inactive sulfide deposit clone (100)                  |   | X |   |   | X | X | sulfate reducer                    |
| Proteobacteria: $\beta$ -proteobacteria                                                      | 6617  | many $\beta$ -proteobacteria clones (96)                             |   |   | X | X | X | X |                                    |
| Proteobacteria: $\alpha$ -proteobacteria: Rhodobacterales: Rhodobacteraceae                  | 5659  | sediment clones (96)                                                 |   | X | X | X | X | X | X                                  |
| Proteobacteria: $\alpha$ -proteobacteria: Rhodobacterales: Rhodobacteraceae                  | 5197  | hydrothermal vent and seafloor basalt clones (100)                   | X | X | X | X |   |   |                                    |
| Proteobacteria: $\gamma$ -proteobacteria: Xanthomonadales: Xanthomonadaceae                  | 4133  | Mariana Trough sulfide deposit clones (98)                           | X | X | X | X | X |   | X                                  |
| Proteobacteria: $\delta$ -proteobacteria: Desulfobacterales: Desulfobulbaceae: Desulfocapsa  | 3863  | many $\delta$ -proteobacteria clones (100)                           | X | X | X |   | X |   | sulfate reducer                    |
| Bacteroidetes                                                                                | 3457  | inactive and low temperature hydrothermal sulfide clones (100)       |   | X |   | X | X | X | X                                  |
| Proteobacteria: $\alpha$ -proteobacteria: Rhodobacterales: Rhodobacteraceae                  | 3563  | Mariana Trough and Tonga Arc sulfide deposit clones (100)            | X | X | X |   | X |   |                                    |
| Proteobacteria: $\gamma$ -proteobacteria: Chromatiales: Ectothiorhodospiraceae               | 2818  | Mariana Trough seafloor massive sulfide deposit clone (100)          |   | X |   |   | X | X | X chemolithoautotrophic S-oxidizer |

|                                                                                                                     |      |                                                                          |   |   |   |   |   |   |                 |
|---------------------------------------------------------------------------------------------------------------------|------|--------------------------------------------------------------------------|---|---|---|---|---|---|-----------------|
| Proteobacteria: $\alpha$ -proteobacteria:<br>Rhodobacterales:<br>Rhodobacteraceae                                   | 2811 | hydrothermal vent clones<br>(only 4 matches total, all<br>100% identity) | X | X | X |   | X | X |                 |
|                                                                                                                     | 2682 |                                                                          |   |   |   |   |   |   |                 |
| Proteobacteria<br>Proteobacteria: $\delta$ -proteobacteria:<br>Desulfobacterales:<br>Desulfobulbaceae: Desulfocapsa | 2307 | many clones (100)<br>hydrothermal vent clones<br>(100)                   | X | X | X | X | X | X | sulfate reducer |
