# Supplementary figures and images for: Life and Death of Deep-Sea Vents: Bacterial Diversity and Ecosystem Succession on Inactive Hydrothermal Sulfides
Source: PubMed Central journal article supplement — mBio. 2012 Jan 24;3(1):e00279-11. doi: 10.1128/mBio.00279-11 (PMC3262234; doi:10.1128/mbio.00279-11), 2012-01-24

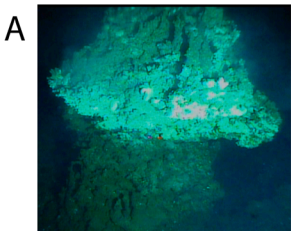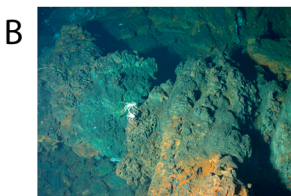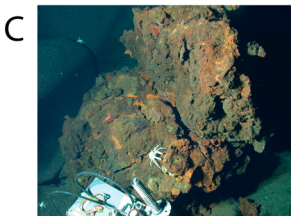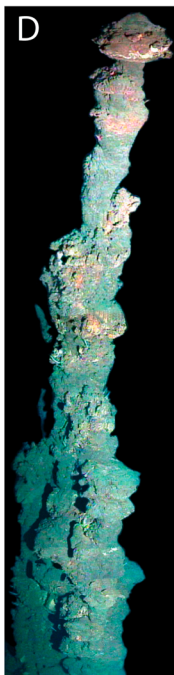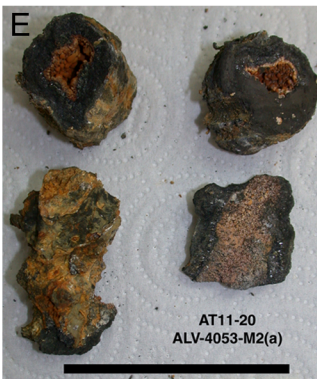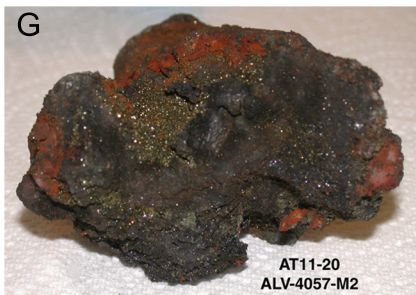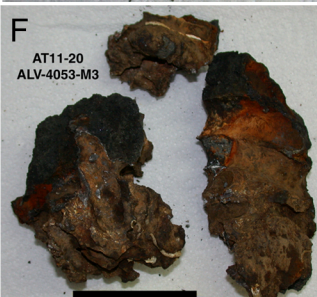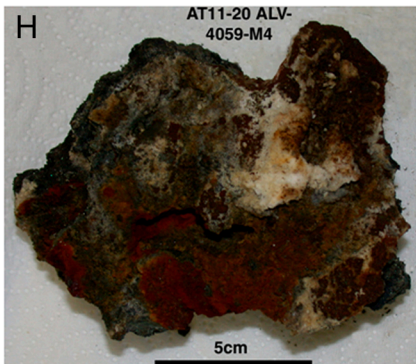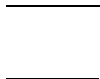

Supplement: mbo001121217sf01.pdf [file mbo001121217sf01.pdf]

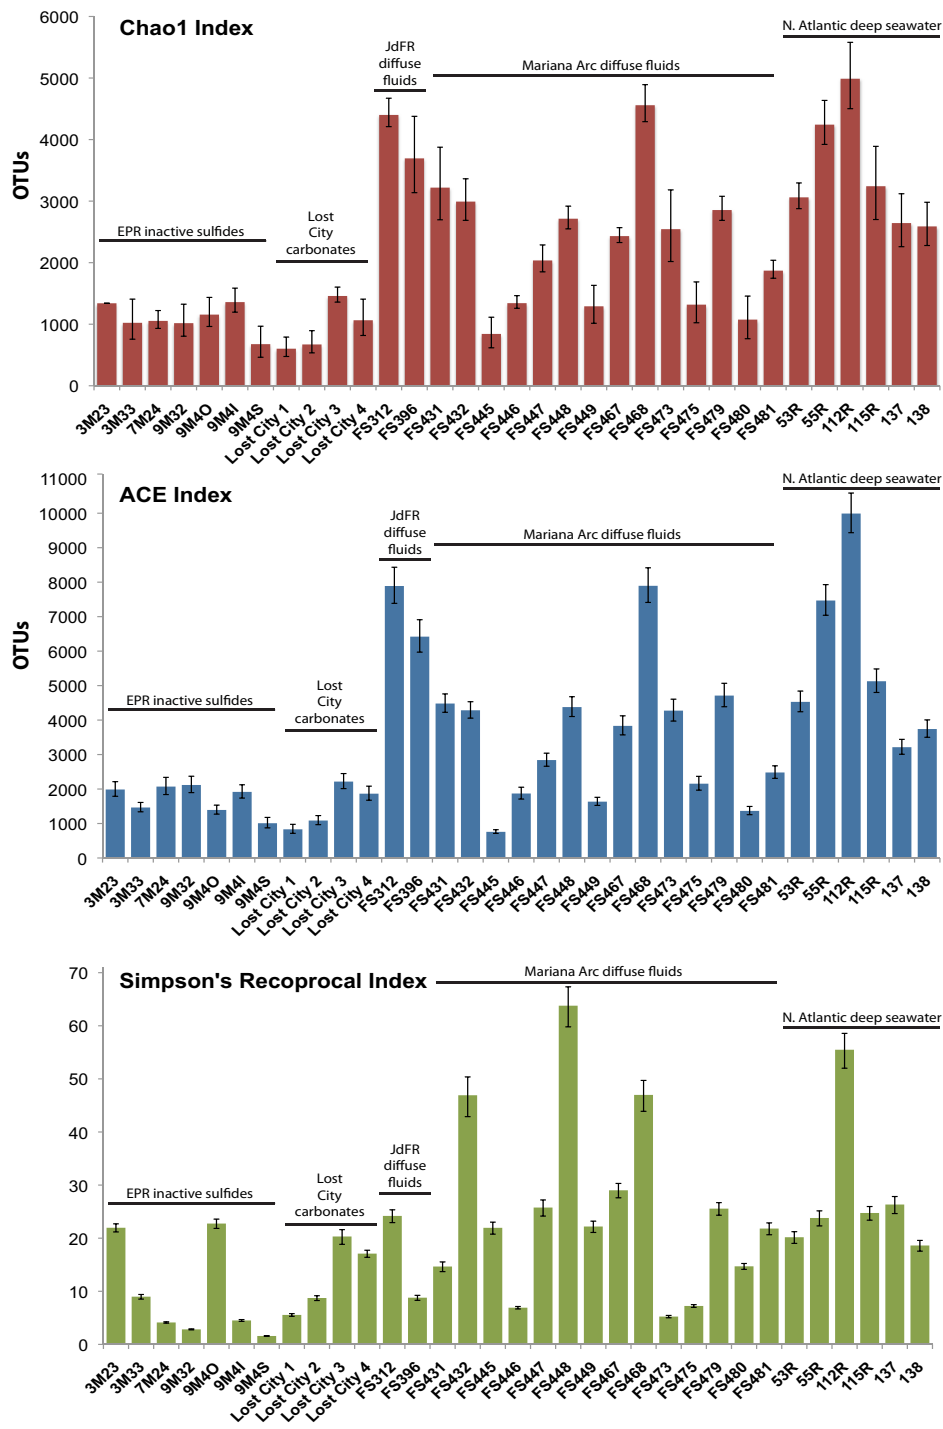

Supplement: mbo001121217sf02.pdf [file mbo001121217sf02.pdf]
